# Supplementary material for: A fluorescent probe for estimation of adenosine diphosphate and monitoring of glucose metabolism
Source: Royal Society of Chemistry journal article supplement (doi:10.1039/c3ob42505c), 2014-01-01
Supplement: c3ob42505c2.pdf [file c3ob42505c2.pdf]

## **A Fluorescent Probe for Estimation of Adenosine Diphosphate and Monitoring of Glucose Metabolism**

Arun Kumar, Parteek Prasher, Palwinder Singh\*

UGC Sponsored Centre for Advanced Studies, Department of Chemistry, Guru Nanak Dev  
University, Amritsar-143005. India

*Ph. 91-183-2258802-09 x 3495, FAX: 91-183-2258820,*

*e-mail: [palwinder\\_singh\\_2000@yahoo.com](mailto:palwinder_singh_2000@yahoo.com)*

**Supporting Information**

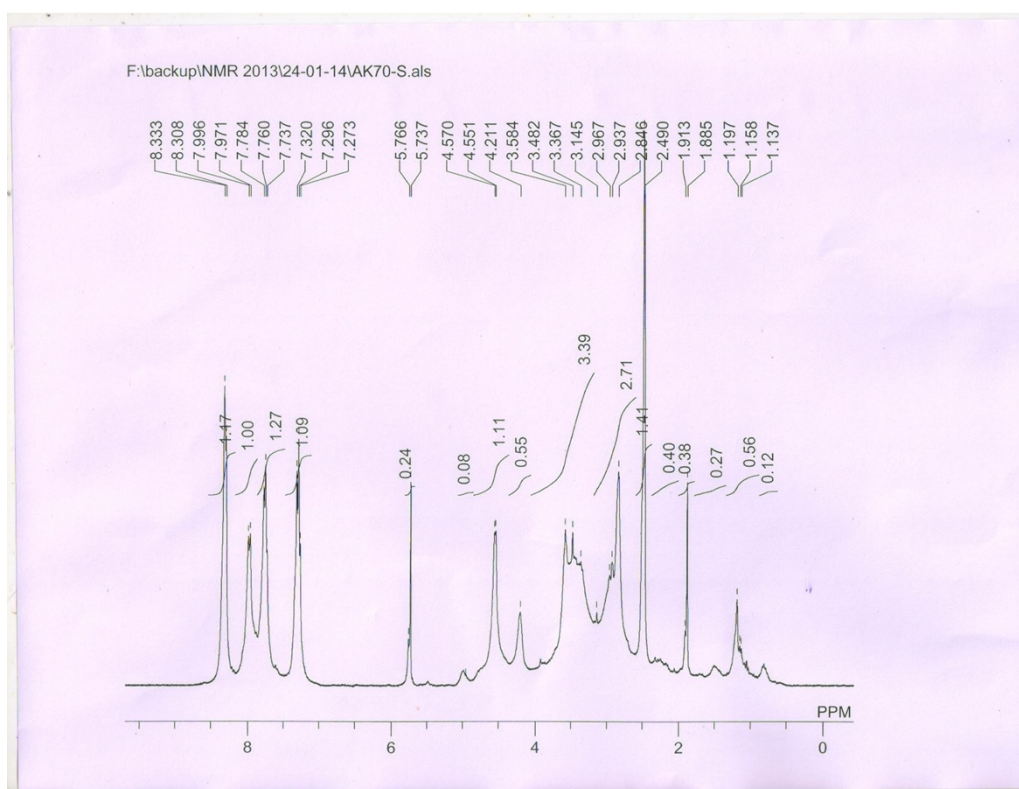

**Figure S1a.**  $^1\text{H}$  NMR spectrum of compound **3** (DMSO  $\delta$  2.49).

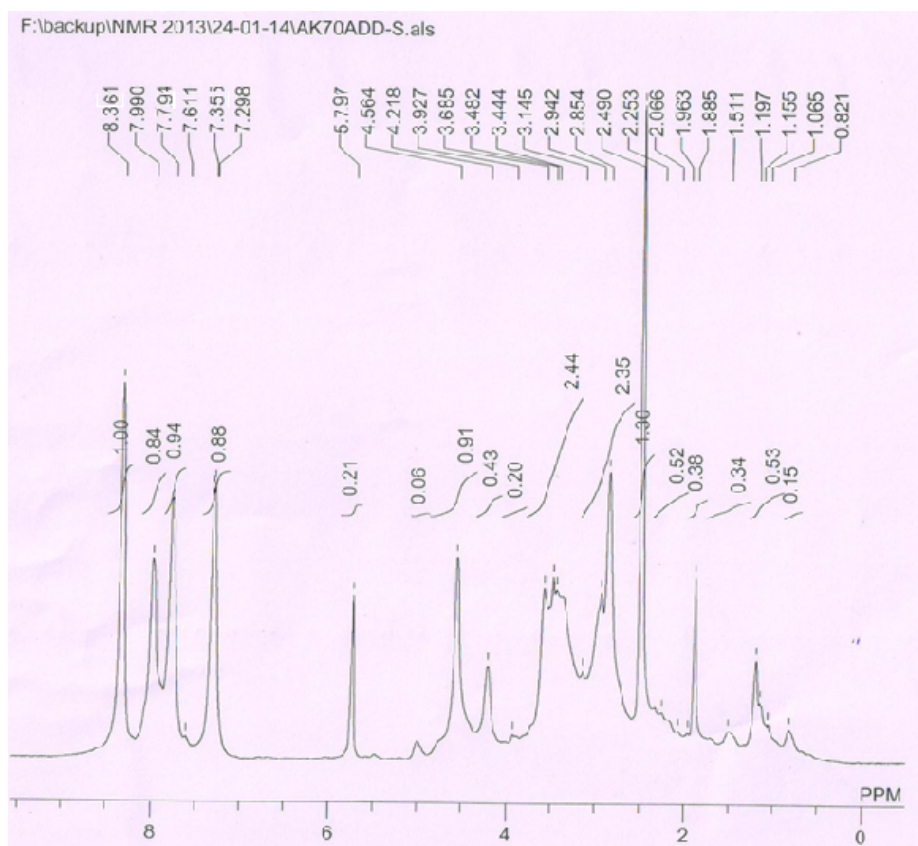

**Figure S1b.**  $^1\text{H}$  NMR spectrum of compound **3**+ADP (DMSO  $\delta$  2.49).

**Table S1. Physico-chemical parameters of compounds 2 and 3 and those reported earlier.<sup>4m</sup>**

| compound                                                                          | logP  | TPSA    | ATP/ADP selectivity |
|-----------------------------------------------------------------------------------|-------|---------|---------------------|
| 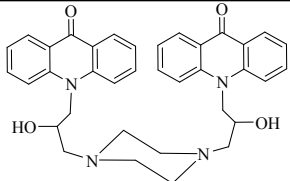 | 2.017 | 90.942  | No selectivity      |
|  | 0.745 | 126.988 | ADP                 |
|  | 2.388 | 54.26   | ATP                 |
| ATP                                                                               | -2.56 | 279.15  |                     |
| ADP                                                                               | -1.55 | 232.61  |                     |

**Table S2. Comparison of ADP/ATP quantification of different steps of glucose metabolism by fluorescence and mass spectral studies.**

| Step of Scheme 2 | Description                             | ATP/ADP produced | Fluorescence studies | LC-MS QuantAnalysis |
|------------------|-----------------------------------------|------------------|----------------------|---------------------|
| 1                | Phosphorylation of glucose              | ADP              | 3.1 ng               | 3.0 ng              |
| 3                | Phosphorylation of fructose-6-phosphate | ADP              | 3.1 ng               | 3.2 ng              |
| 6                | Formation of 3-phosphoglycerate         | ATP              | 55 ng                | 52 ng               |
| 8                | Formation of pyruvate                   | ATP              | 55 ng                | 53 ng               |
|                  | Mitochondria from pig liver             | ADP              | 50 ng                | 48 ng               |

The amount of reagents in each reaction was as given in the text.

**Benesi-Hildebrand plot of 3.ADP.**

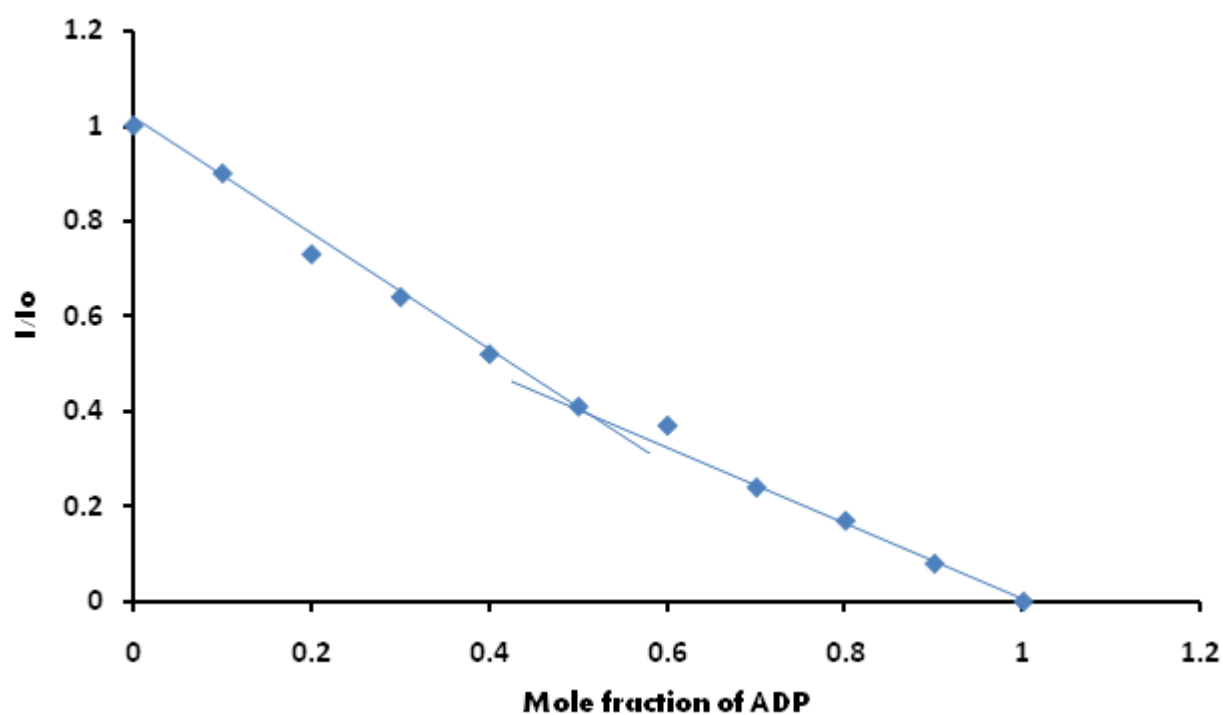

**Figure S2.** Benesi-Hildebrand plot of **3.ADP** indicating 1:1 stoichiometry.

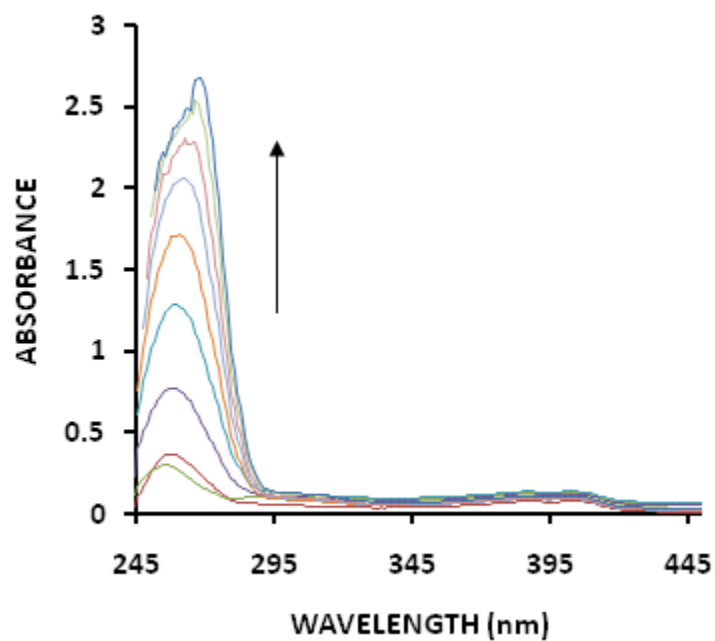

**Figure S3.** Absorbance spectrum of compound **3** ( $10^{-5}$  M) with 0-5 equiv of ADP in HEPES buffer.

### **Equation for calculation of binding constant**

Binding constants of compound-anion complex were calculated using Benesi-Hildebrand Equation.

$$1/(A_f - A_{\text{obs}}) = 1/(A_f - A_{\text{fc}}) + 1/K(A_f - A_{\text{fc}})[L]$$

Where  $A_f$  is absorbance of free host,  $A_{\text{obs}}$  is absorbance observed,  $A_{\text{fc}}$  is absorbance at saturation,  $K$  is the binding constant.

### **Binding constant of compound 3 with ADP**

| Compound. | Binding constant with ADP ( $M^{-1}$ ) |
|-----------|----------------------------------------|
| <b>3</b>  | <b><math>2.14 \times 10^5</math></b>   |

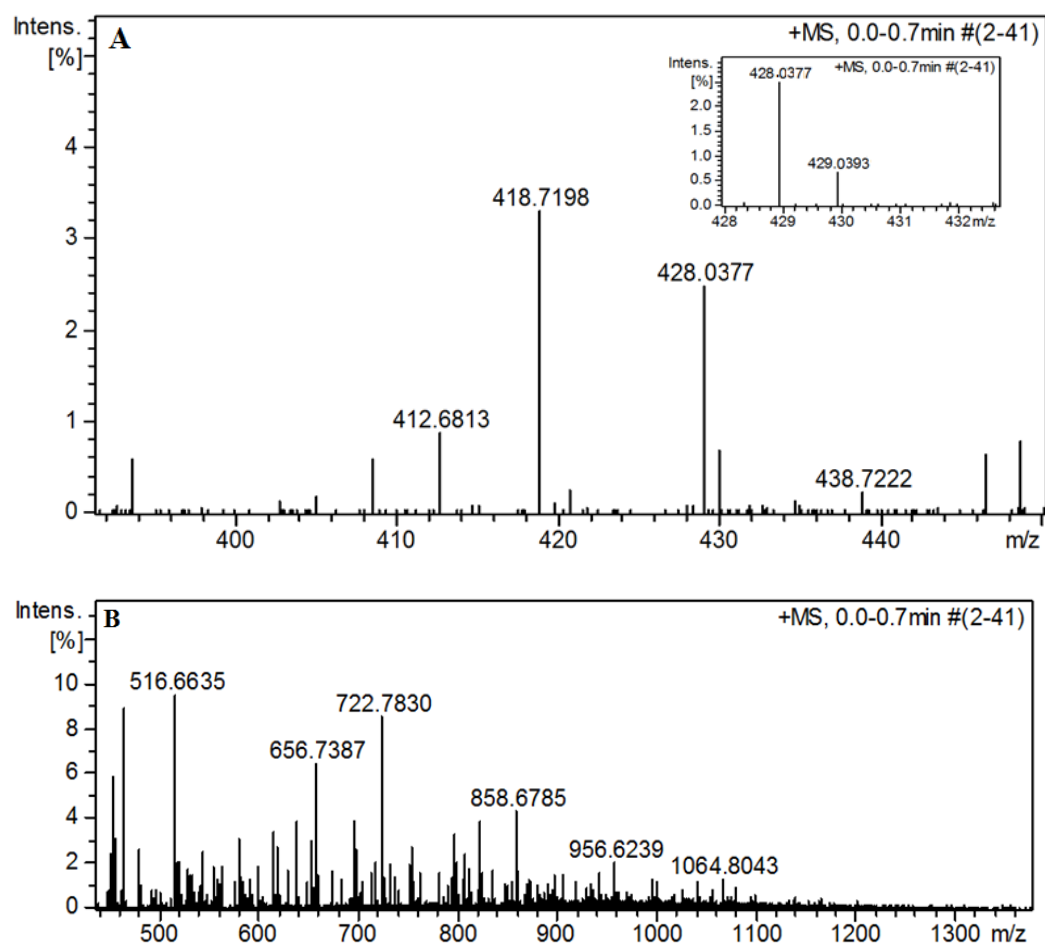

**Figure S4.** High resolution mass spectrum of mitochondrial solution. A) spectrum showing mass peak at  $m/z$  428.0377 corresponding to mass of ADP. Inset: expansion showing isotopic pattern, B) mass spectrum in the higher region showing presence of other components in mitochondria.

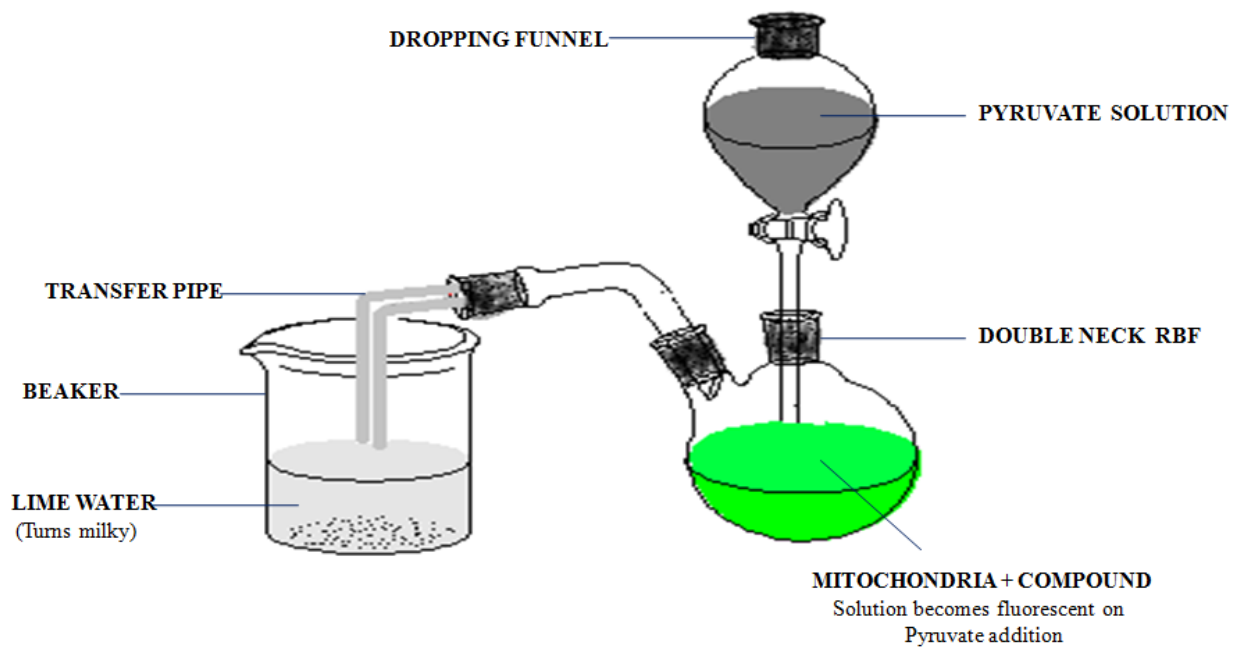

**Figure S5.** Apparatus set up for monitoring the breakdown of pyruvate in mitochondria.

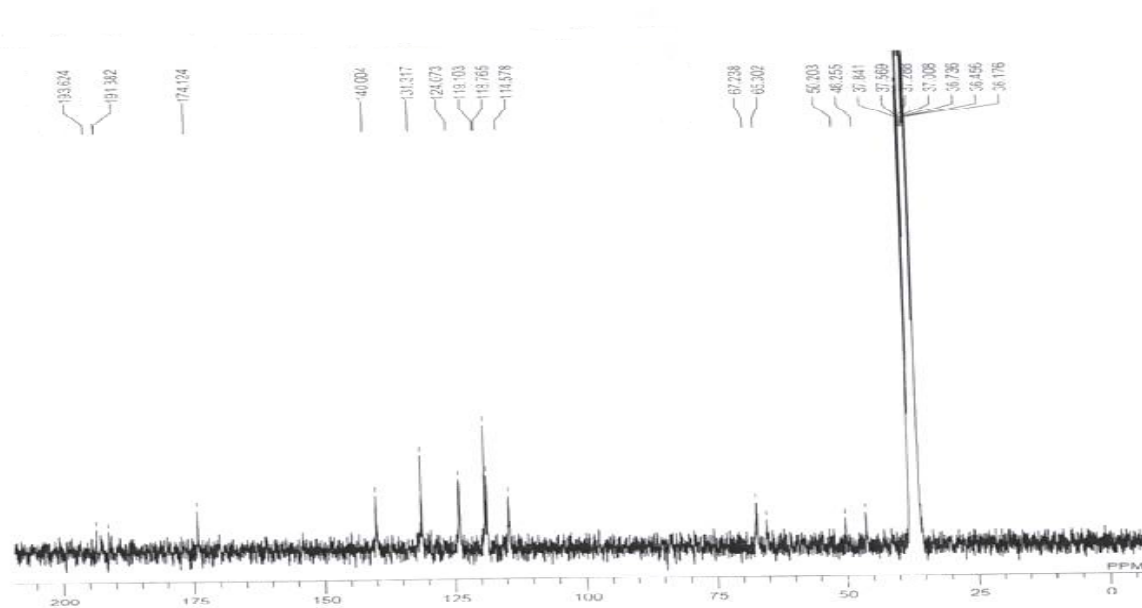

Figure S6.  $^{13}\text{C}$  NMR spectrum of compound 3.

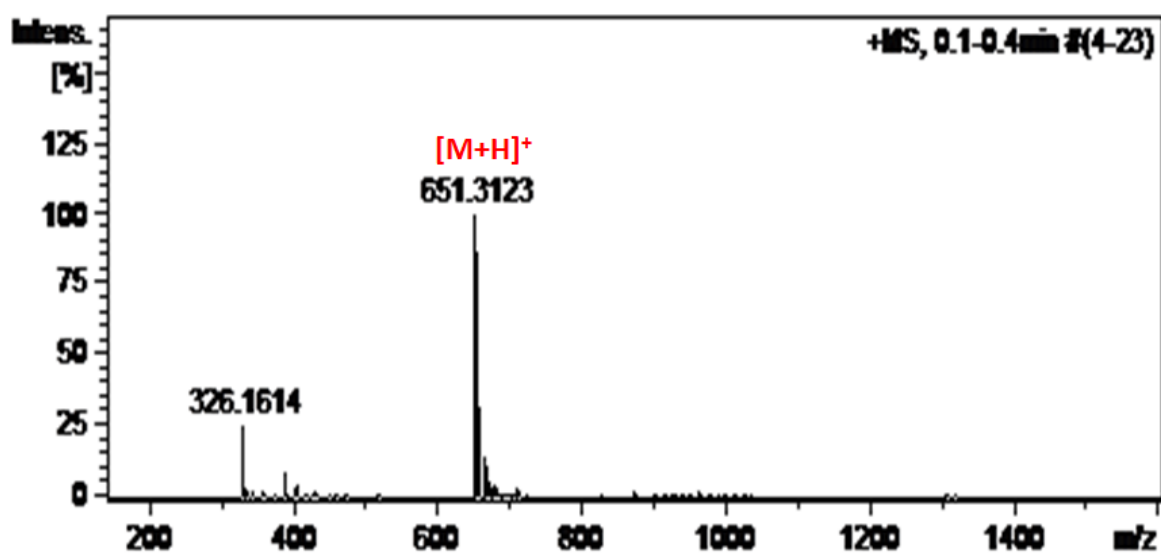

Figure S7. High Resolution Mass Spectrum of compound 3.



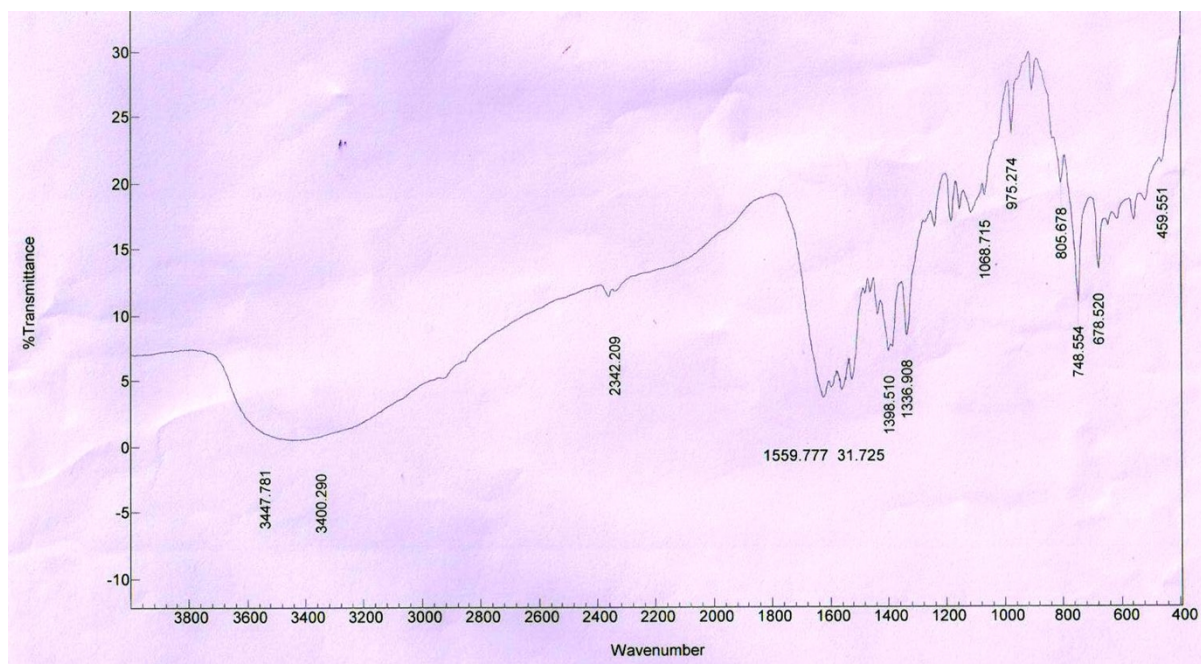

**Figure S8.** IR Spectrum of compound **3**.

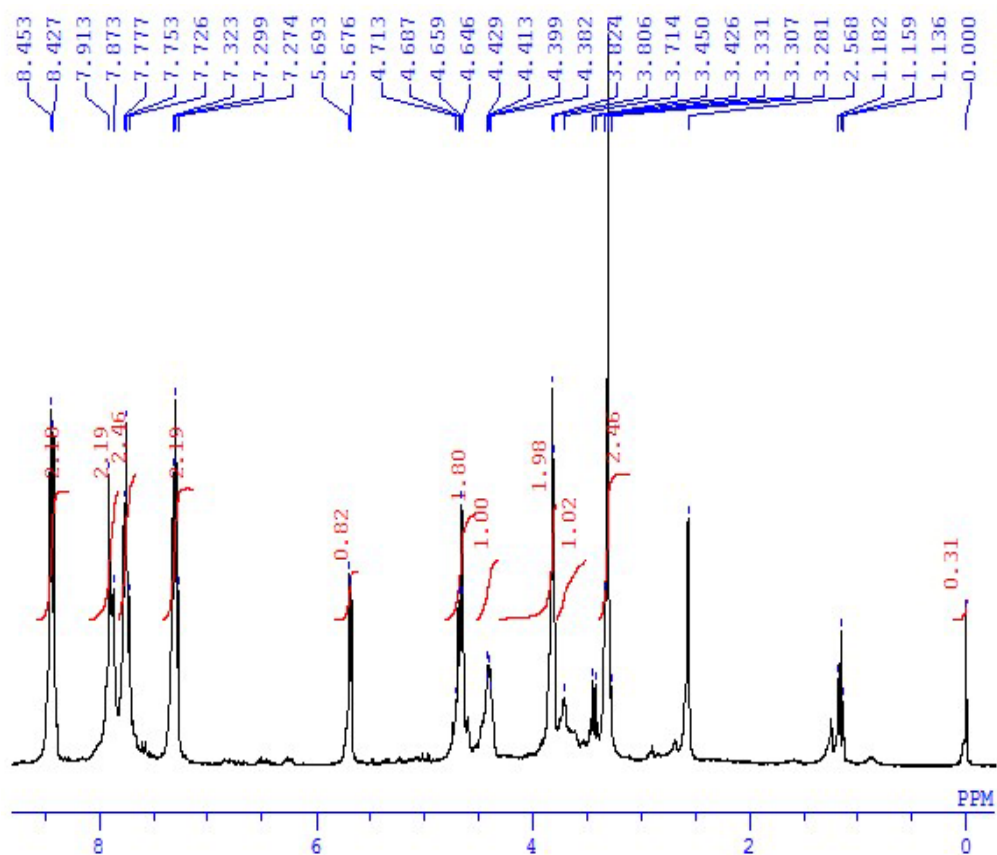

**Figure S9.**  $^1\text{H}$  NMR spectrum of compound **2** ( $\text{CDCl}_3 + \text{DMSO-d}_6$ ). DMSO signal was suppressed.

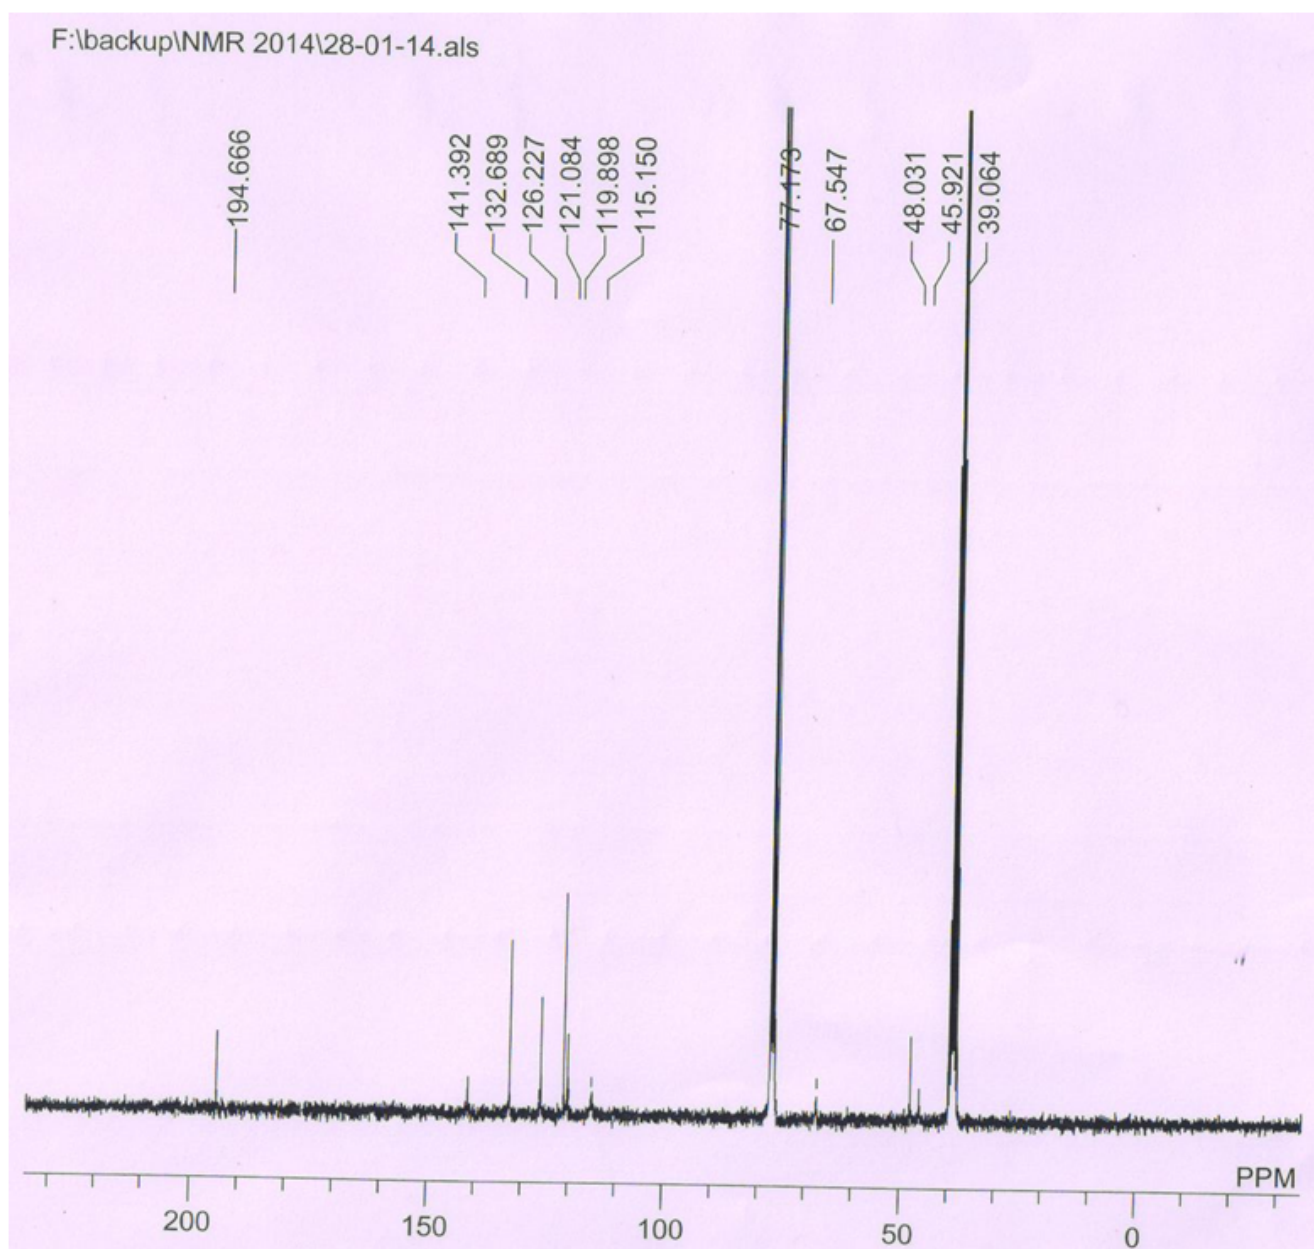

**Figure S10.**  $^{13}\text{C}$  NMR spectrum of compound **2** ( $\text{CDCl}_3 + \text{DMSO}-d_6$ ).

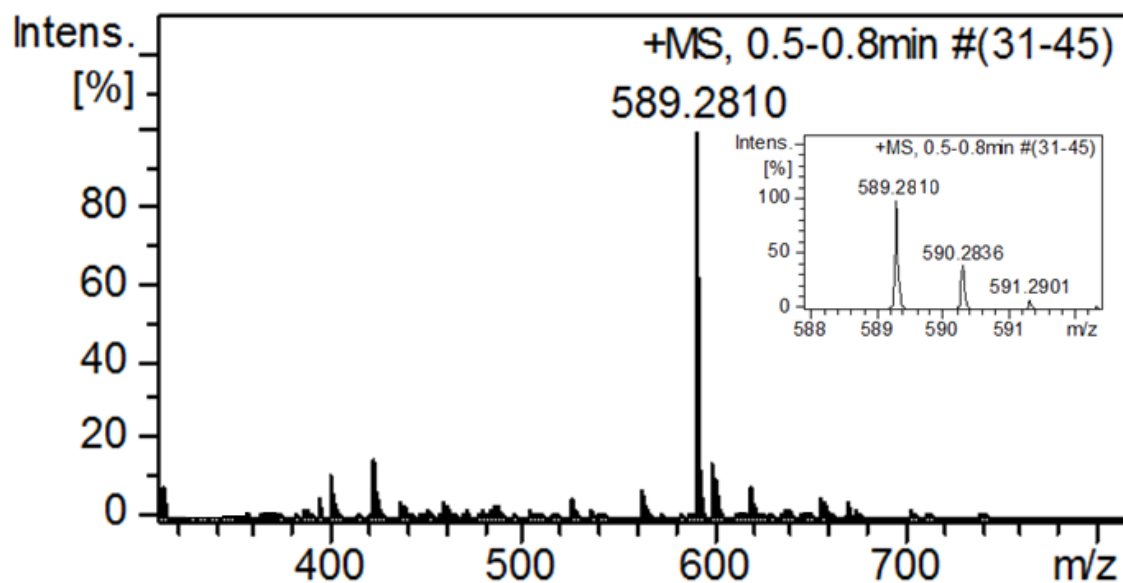

**Figure S11.** HRMS of compound 2. Mass peak at  $m/z$  589.2810 corresponds to mass of compound 2 (calcd  $m/z$  589.2809,  $[M+H]^+$ ).

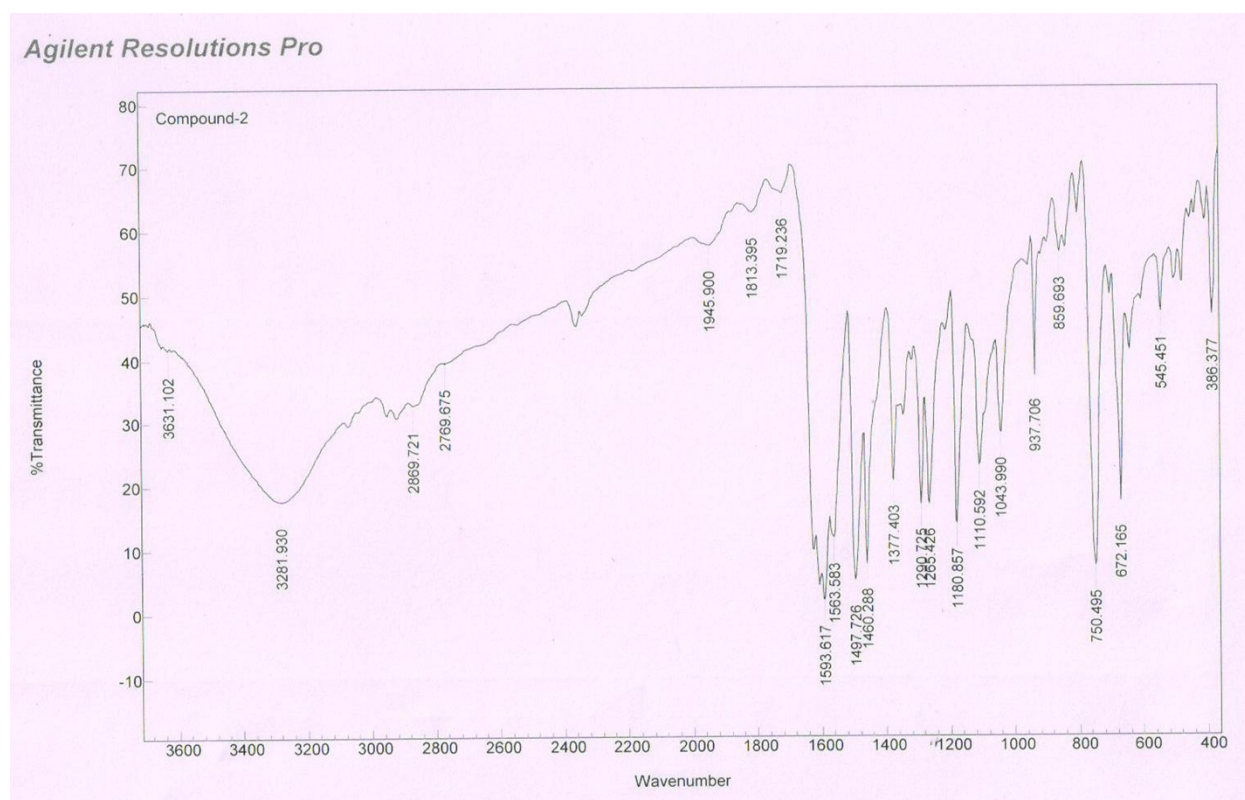

**Figure S12.** IR spectrum of compound 2.
